# Supplementary material for: Confronting the Challenges of Anatomy Education in a Competency-Based Medical Curriculum During Normal and Unprecedented Times (COVID-19 Pandemic): Pedagogical Framework Development and Implementation
Source: PubMed Central journal article supplement (PMC7546732; doi:10.2196/21701), 2020-10-07



# Head & Neck Course:

## *Dissection of the Parotid Gland*

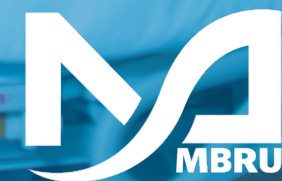

جامعة محمد بن راشد  
للطب والعلوم الصحية  
MOHAMMED BIN RASHID UNIVERSITY  
OF MEDICINE AND HEALTH SCIENCES

# Learning Objectives:

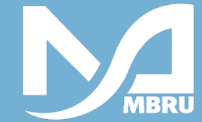

**At the end of this session, the student should be able to:**

- **Identify key surgical landmarks.**
- **Perform a safe resection of the parotid gland (i.e. total parotidectomy) during routine dissection by employing the detailed steps provided.**

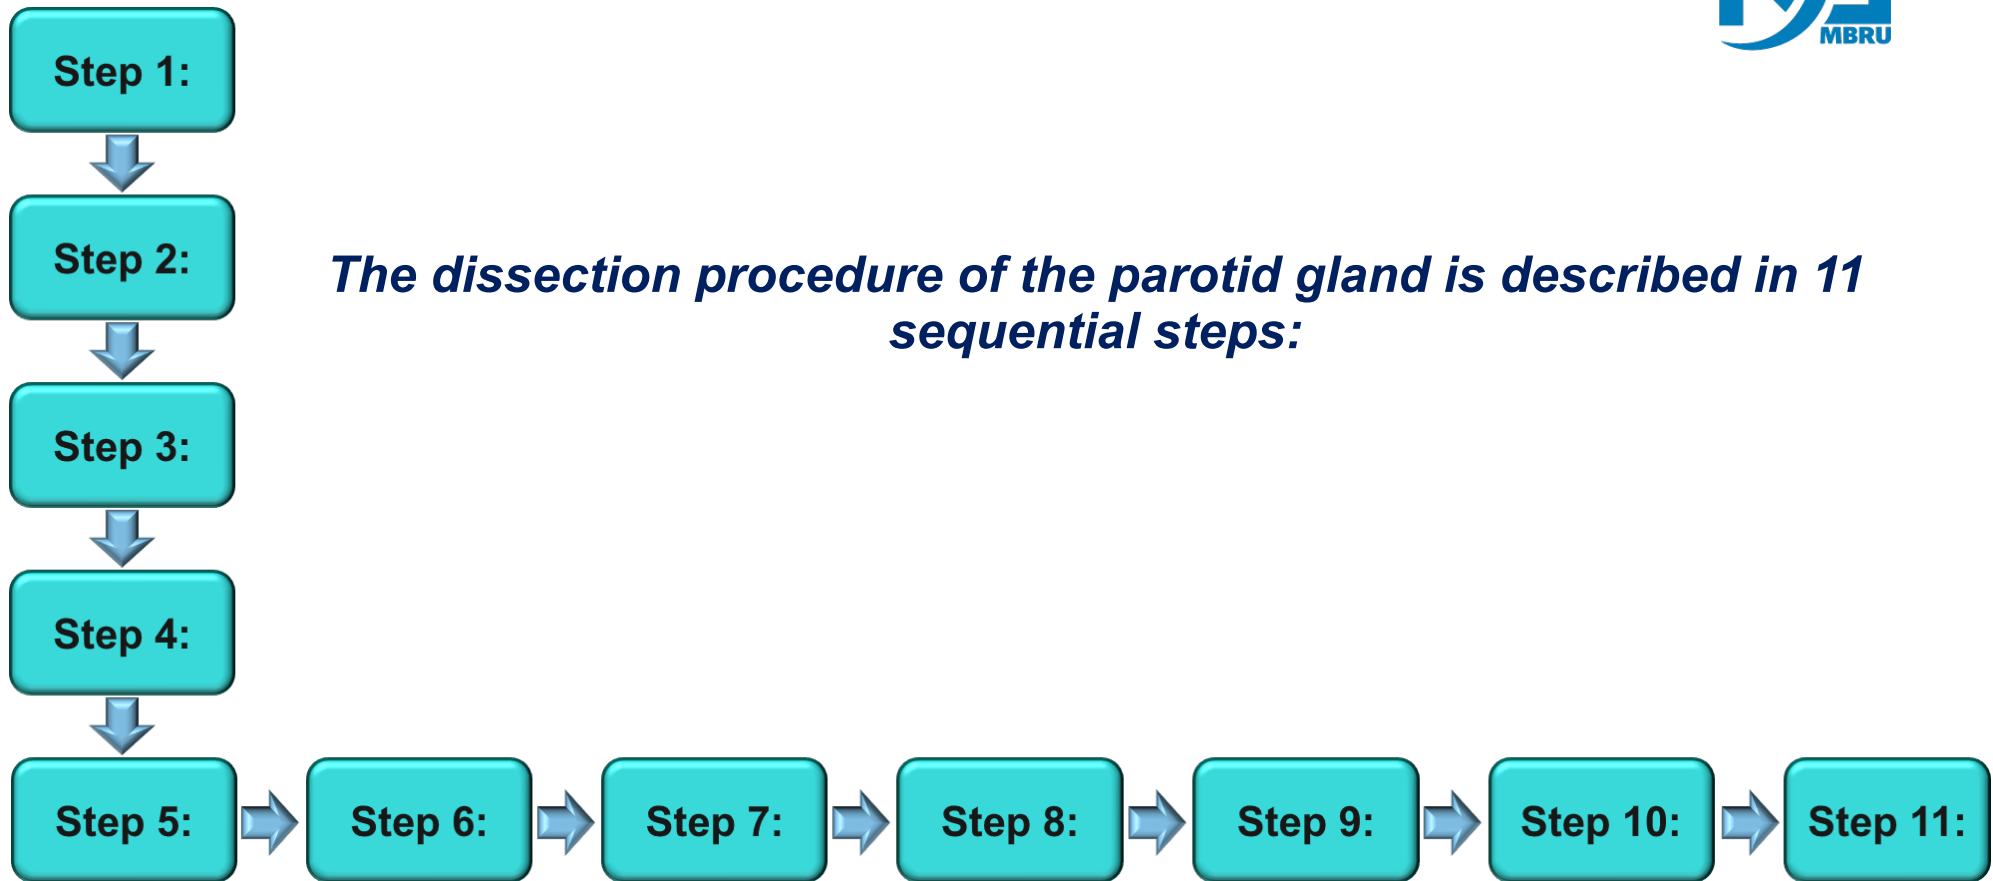

*The dissection procedure of the parotid gland is described in 11 sequential steps:*

***POSITION:***

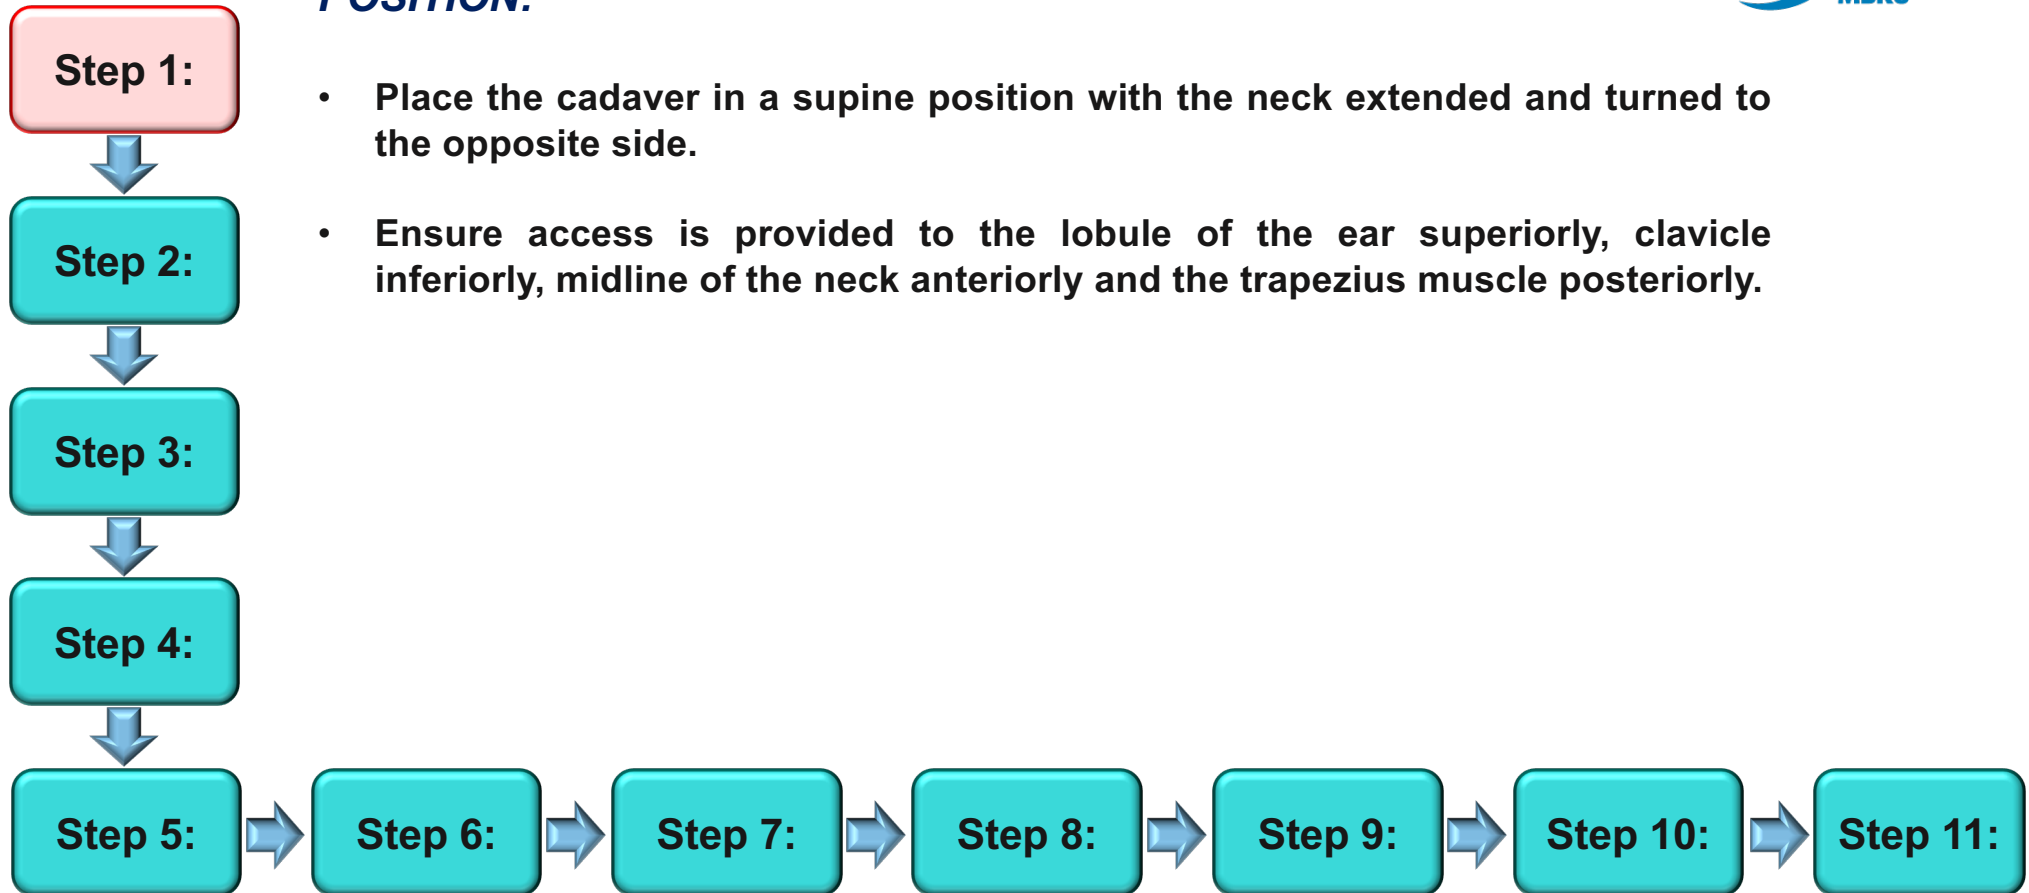

**Step 1:**

**Step 2:**

**Step 3:**

**Step 4:**

**Step 5:**

**Step 6:**

**Step 7:**

**Step 8:**

**Step 9:**

**Step 10:**

**Step 11:**

- Place the cadaver in a supine position with the neck extended and turned to the opposite side.
- Ensure access is provided to the lobule of the ear superiorly, clavicle inferiorly, midline of the neck anteriorly and the trapezius muscle posteriorly.

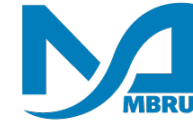

## ***PALPATION & IDENTIFICATION OF KEY ANATOMICAL LANDMARKS:***

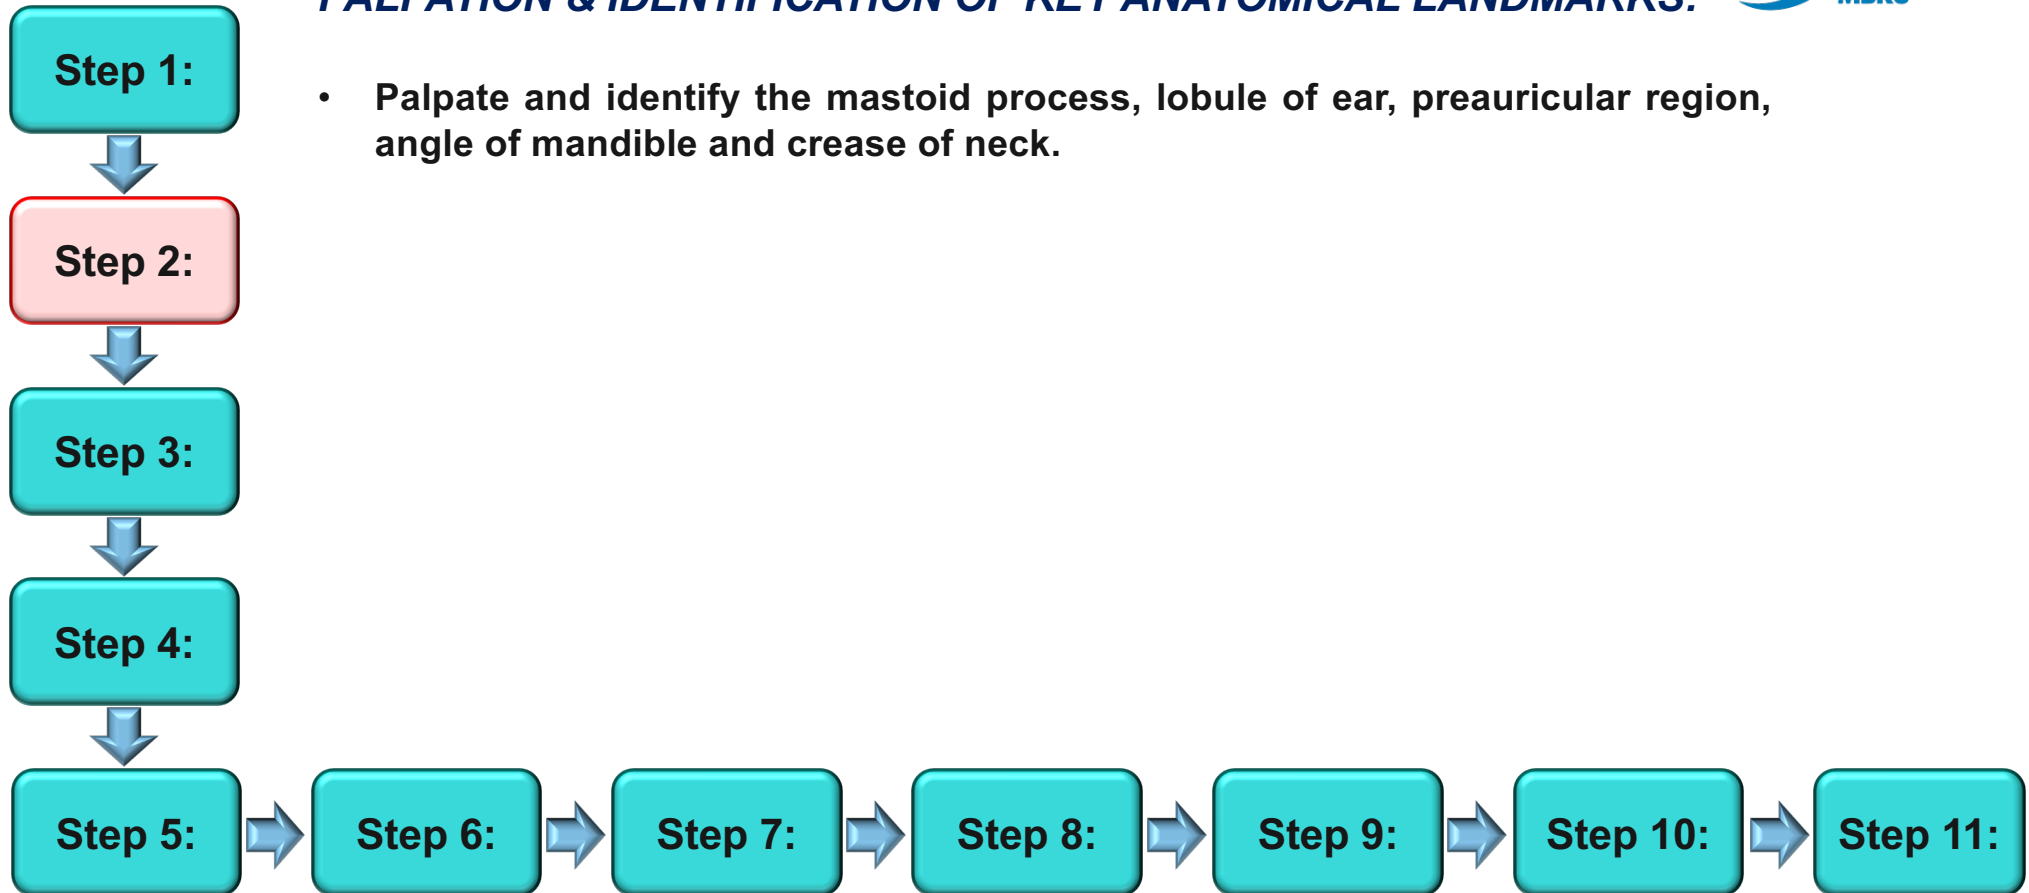

***INCISION:***

- **Make a modified Blair/S incision which will extend from the preauricular region, around the lobule of the ear towards the tip of the mastoid process, and then curve inferiorly beyond the angle of the mandible to finally join the neck crease.**

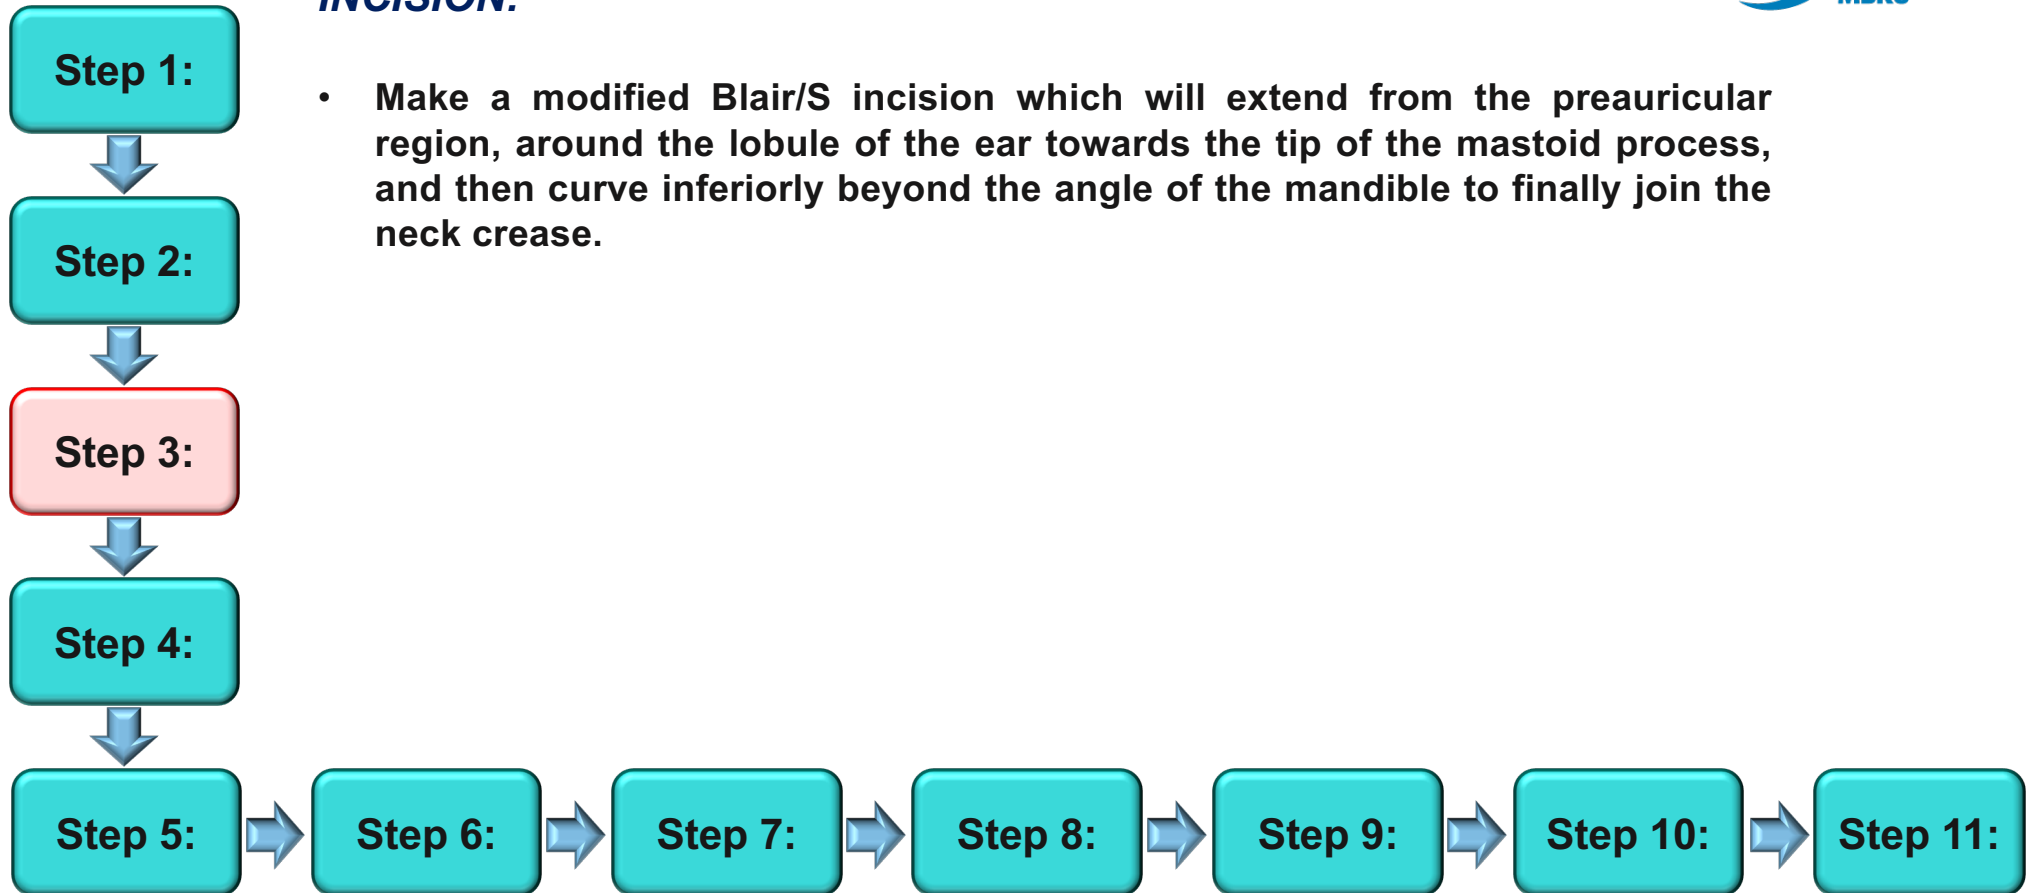

### ***SKIN FLAP ELEVATION:***

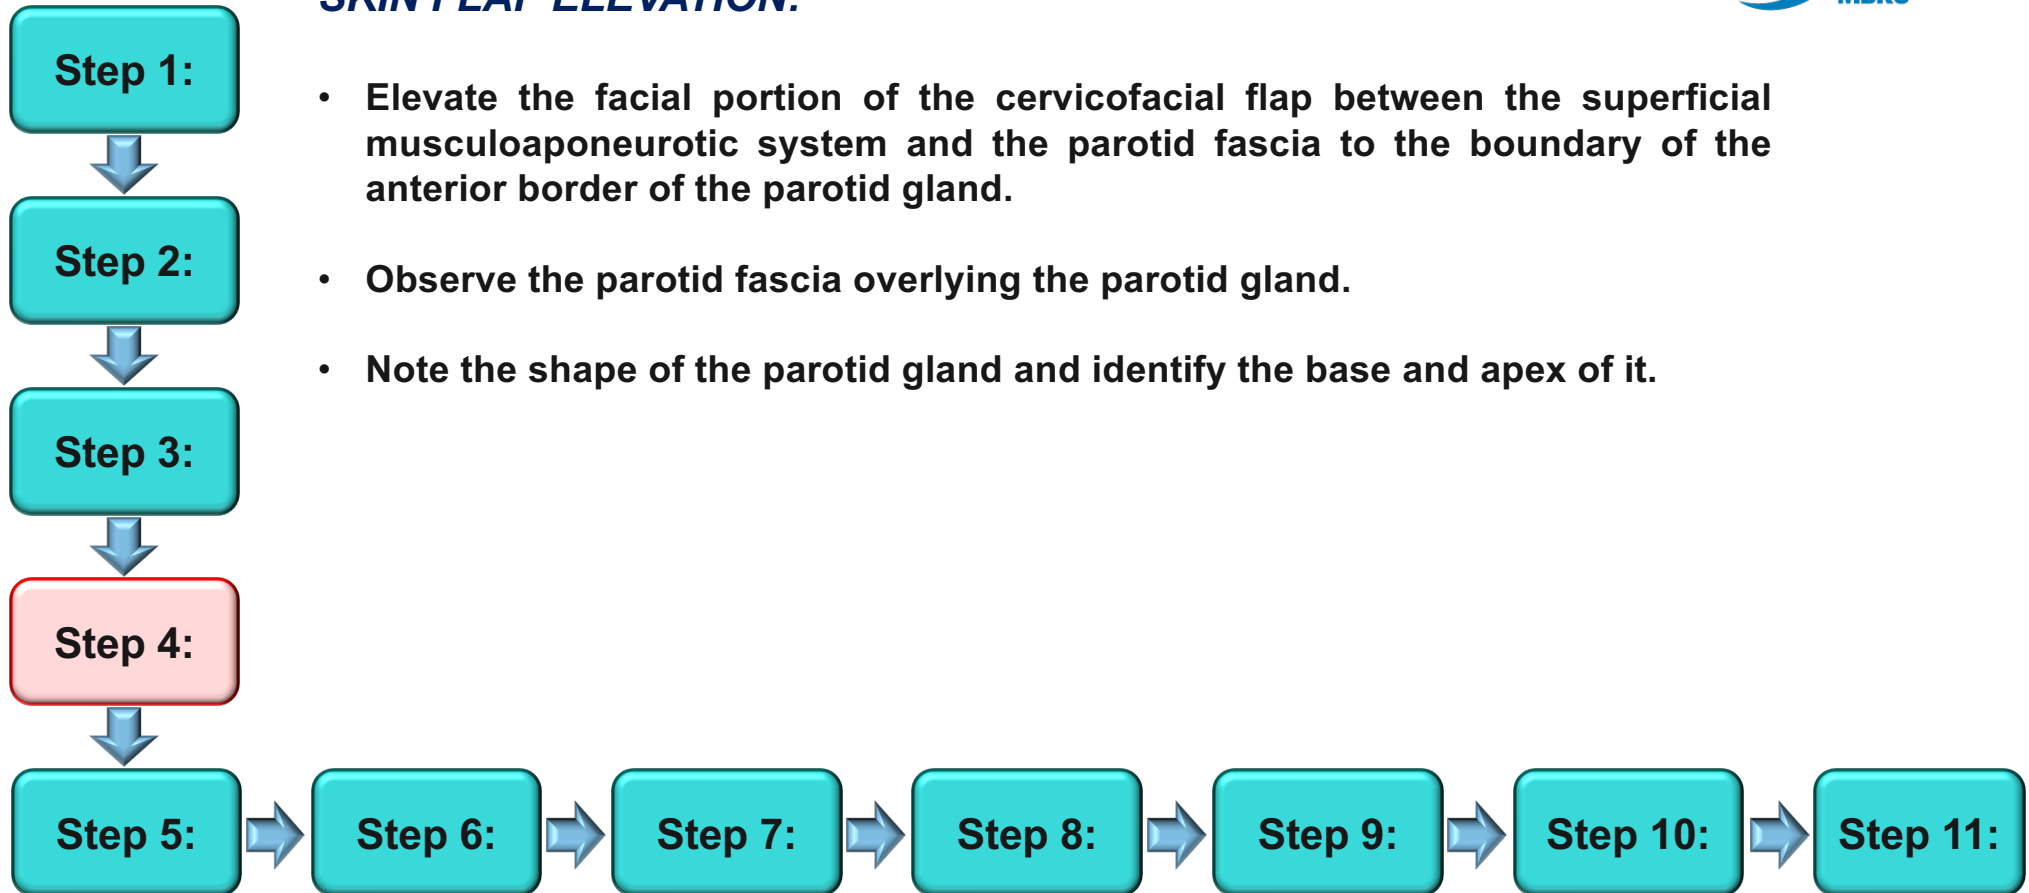

## ***IDENTIFICATON OF GREAT AURICULAR NERVE:***

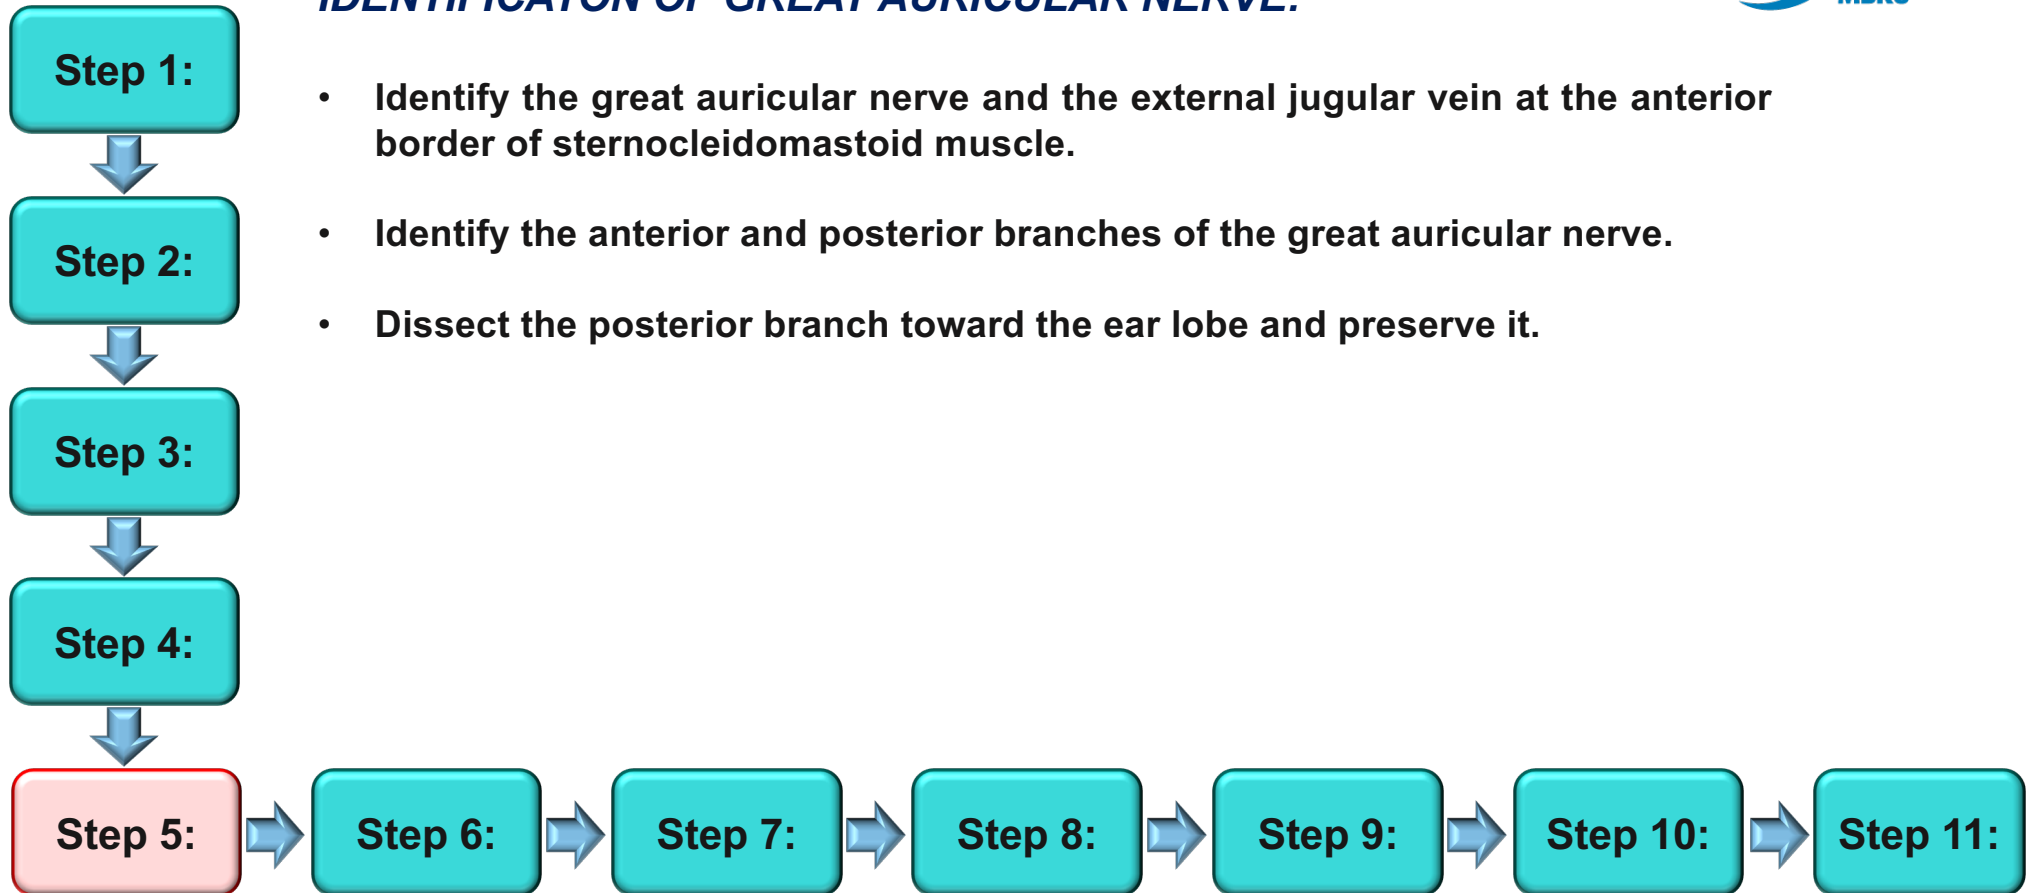



## **SEPARATION OF PAROTID GLAND FROM STERNOCLEIDOMASTOID MUSCLE:**

- Outline the anterior border of the sternocleidomastoid muscle and bluntly dissect it from the parotid gland.

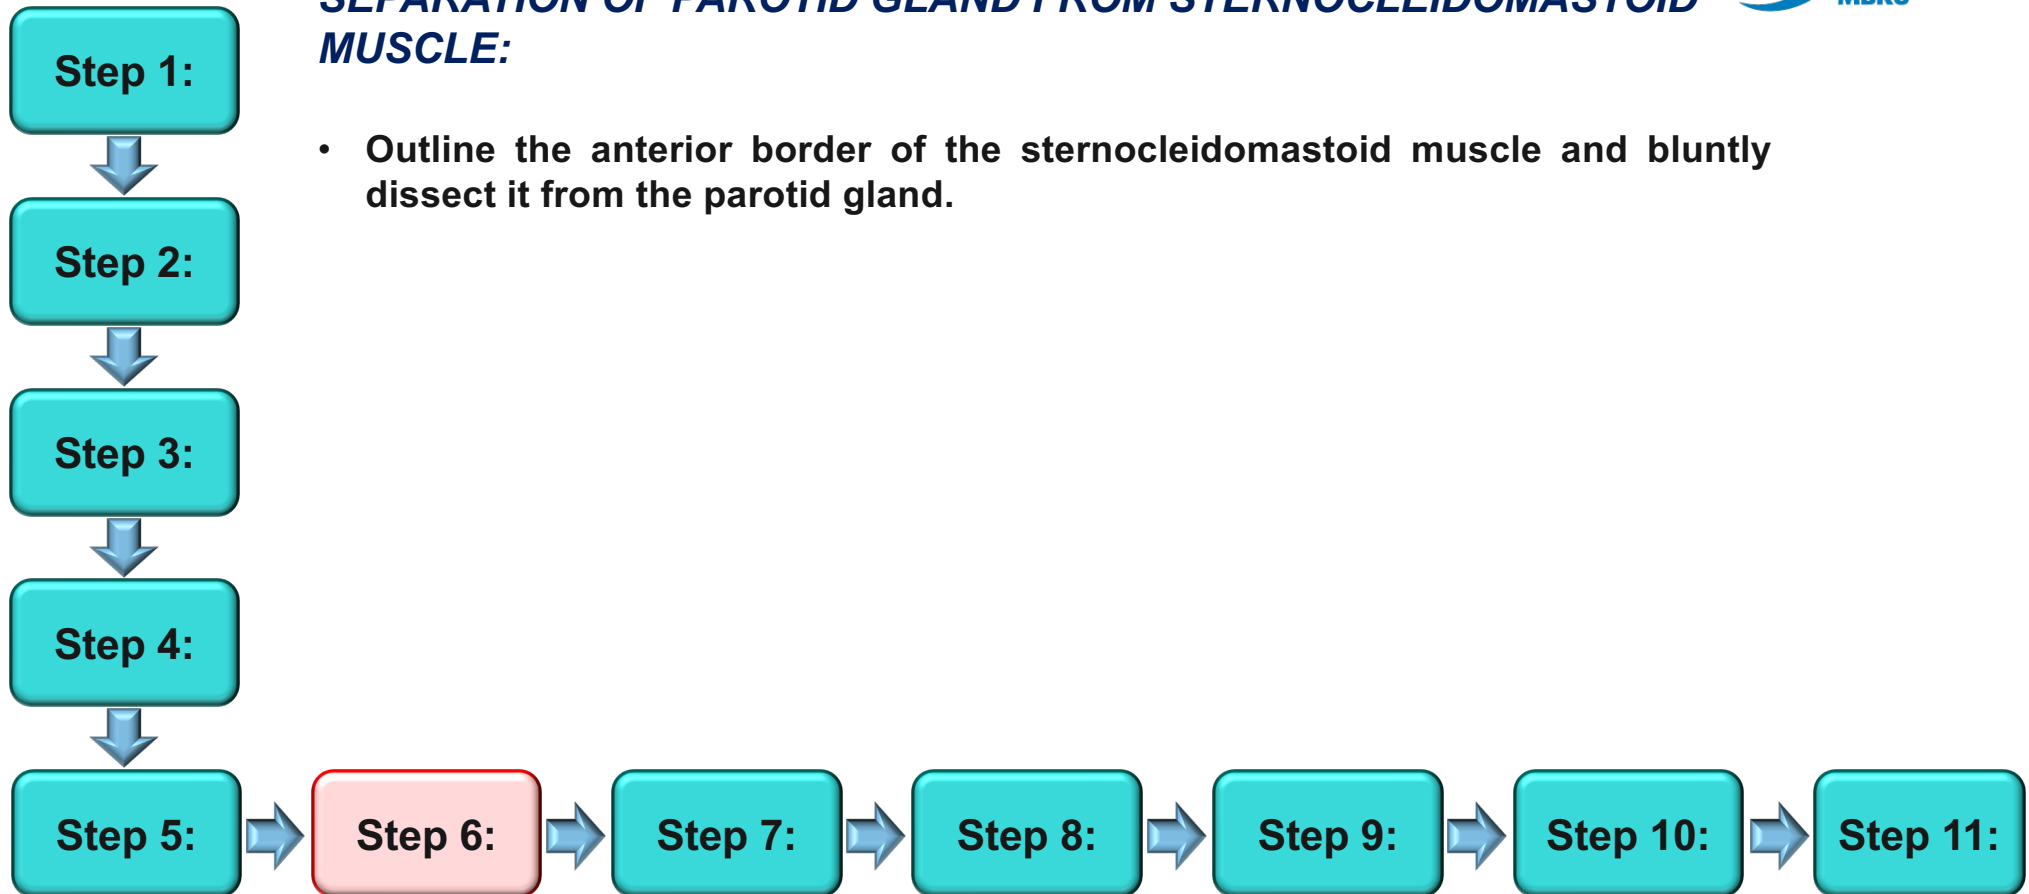

## ***IDENTIFICATON OF POSTERIOR BELLY OF DIGASTRIC MUSCLE:***

- At the apex, carefully reflect the parotid gland superiorly to expose the posterior belly of the digastric muscle.

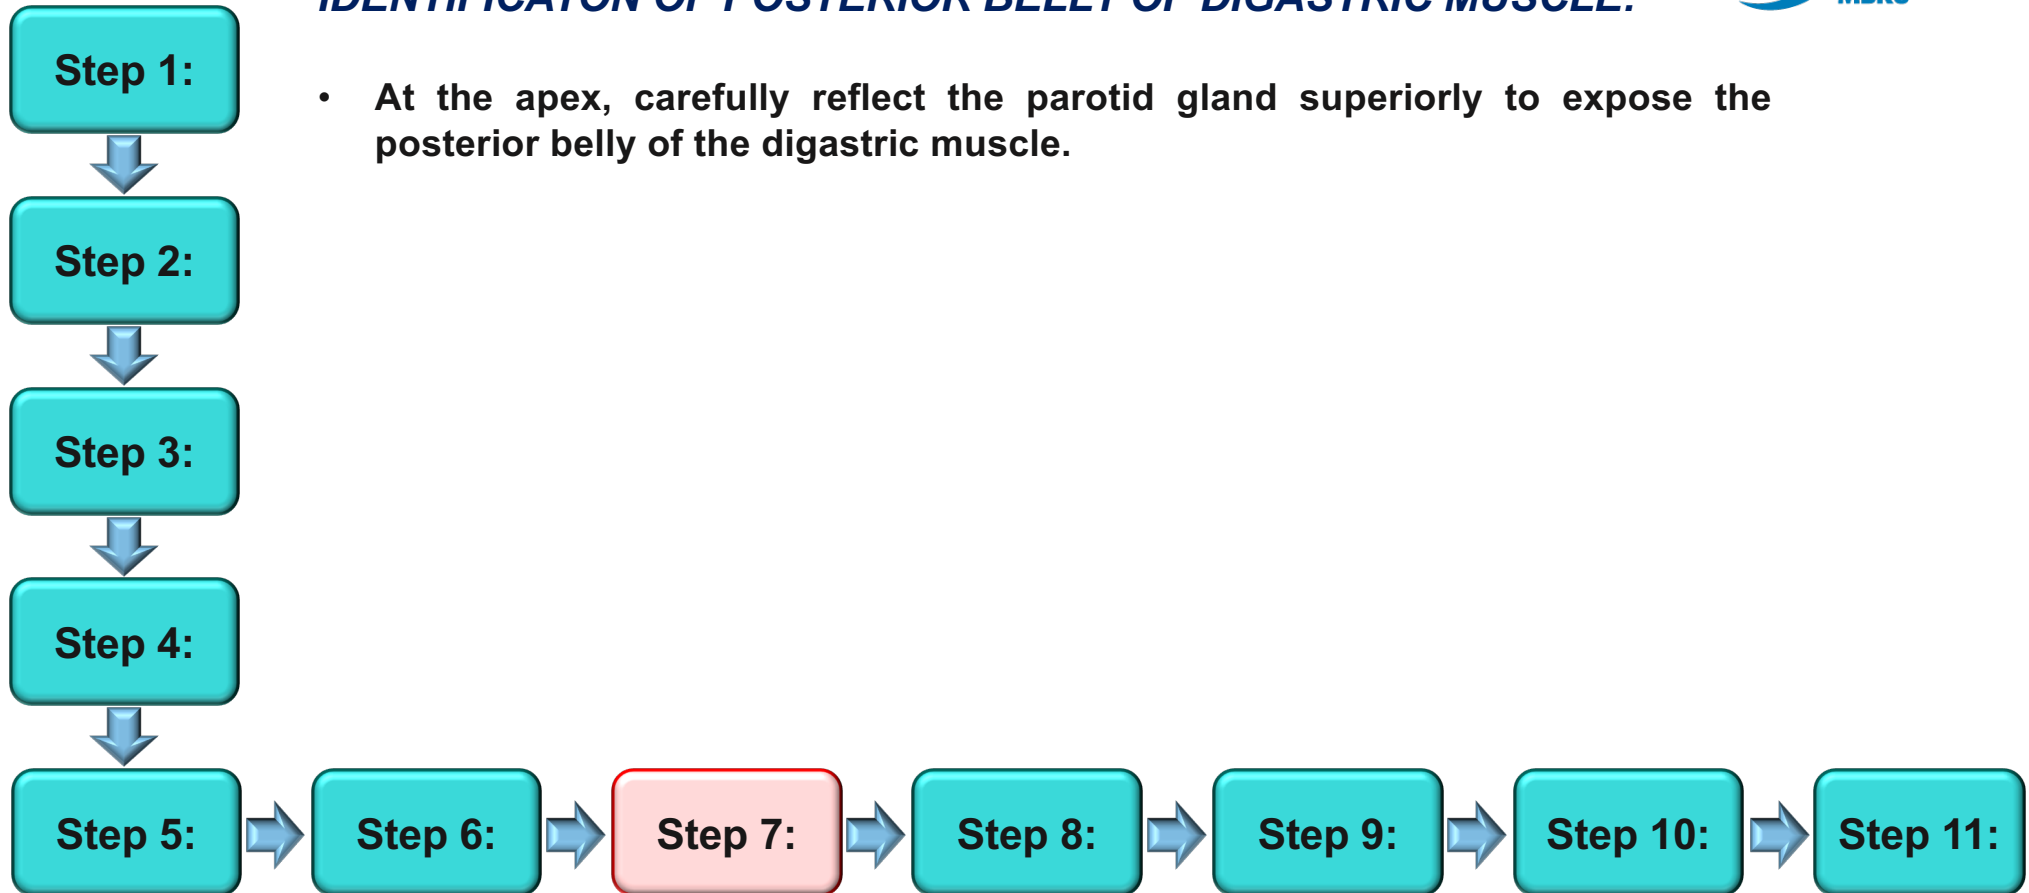

## IDENTIFICATION OF LANDMARKS FOR FACIAL NERVE:

- In order to locate the facial nerve, identify the tragal pointer, tympanomastoid suture, posterior belly of digastric and styloid process.

| <i>Landmark</i>                     | <i>Location of facial nerve in relation to landmark</i> |
|-------------------------------------|---------------------------------------------------------|
| Tragal pointer                      | Approximately 1cm antero-infero-medial                  |
| Tympanomastoid suture               | 6-8mm deep to suture                                    |
| Posterior belly of digastric muscle | Superior and parallel                                   |
| Styloid process                     | Laterally-located                                       |

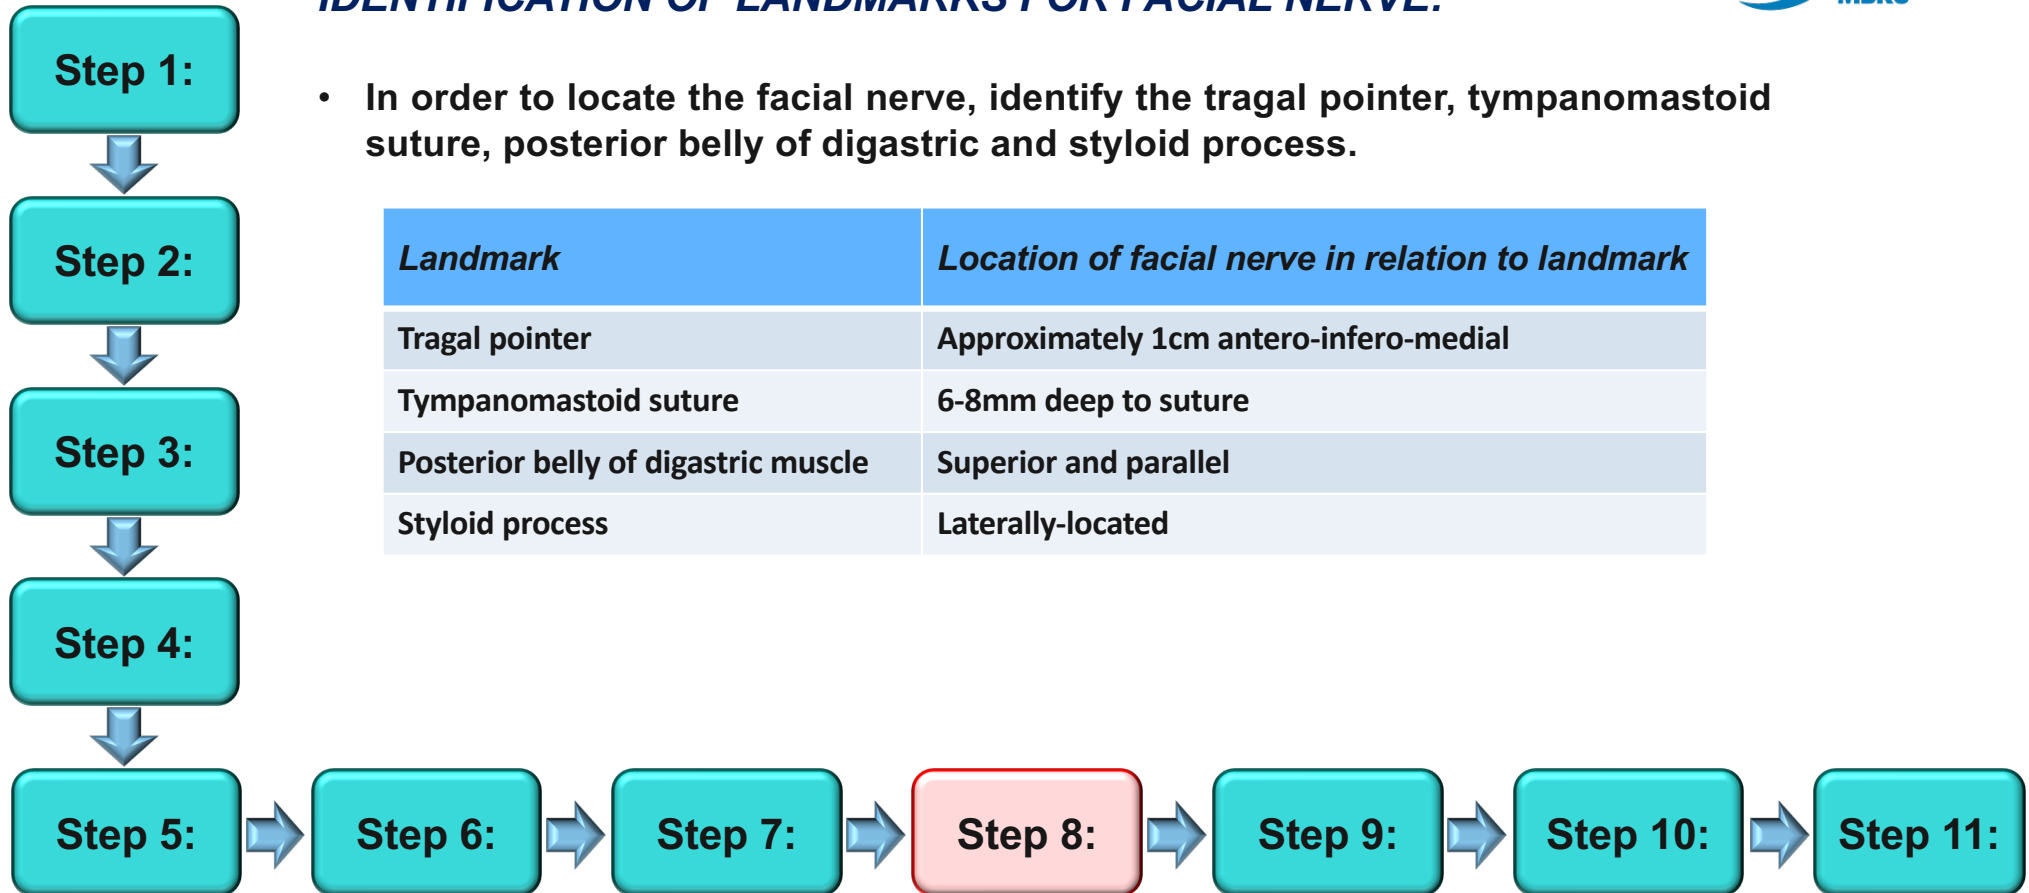

## ***IDENTIFICATION OF PES ANSERINUS AND DIVISIONS OF FACIAL NERVE:***

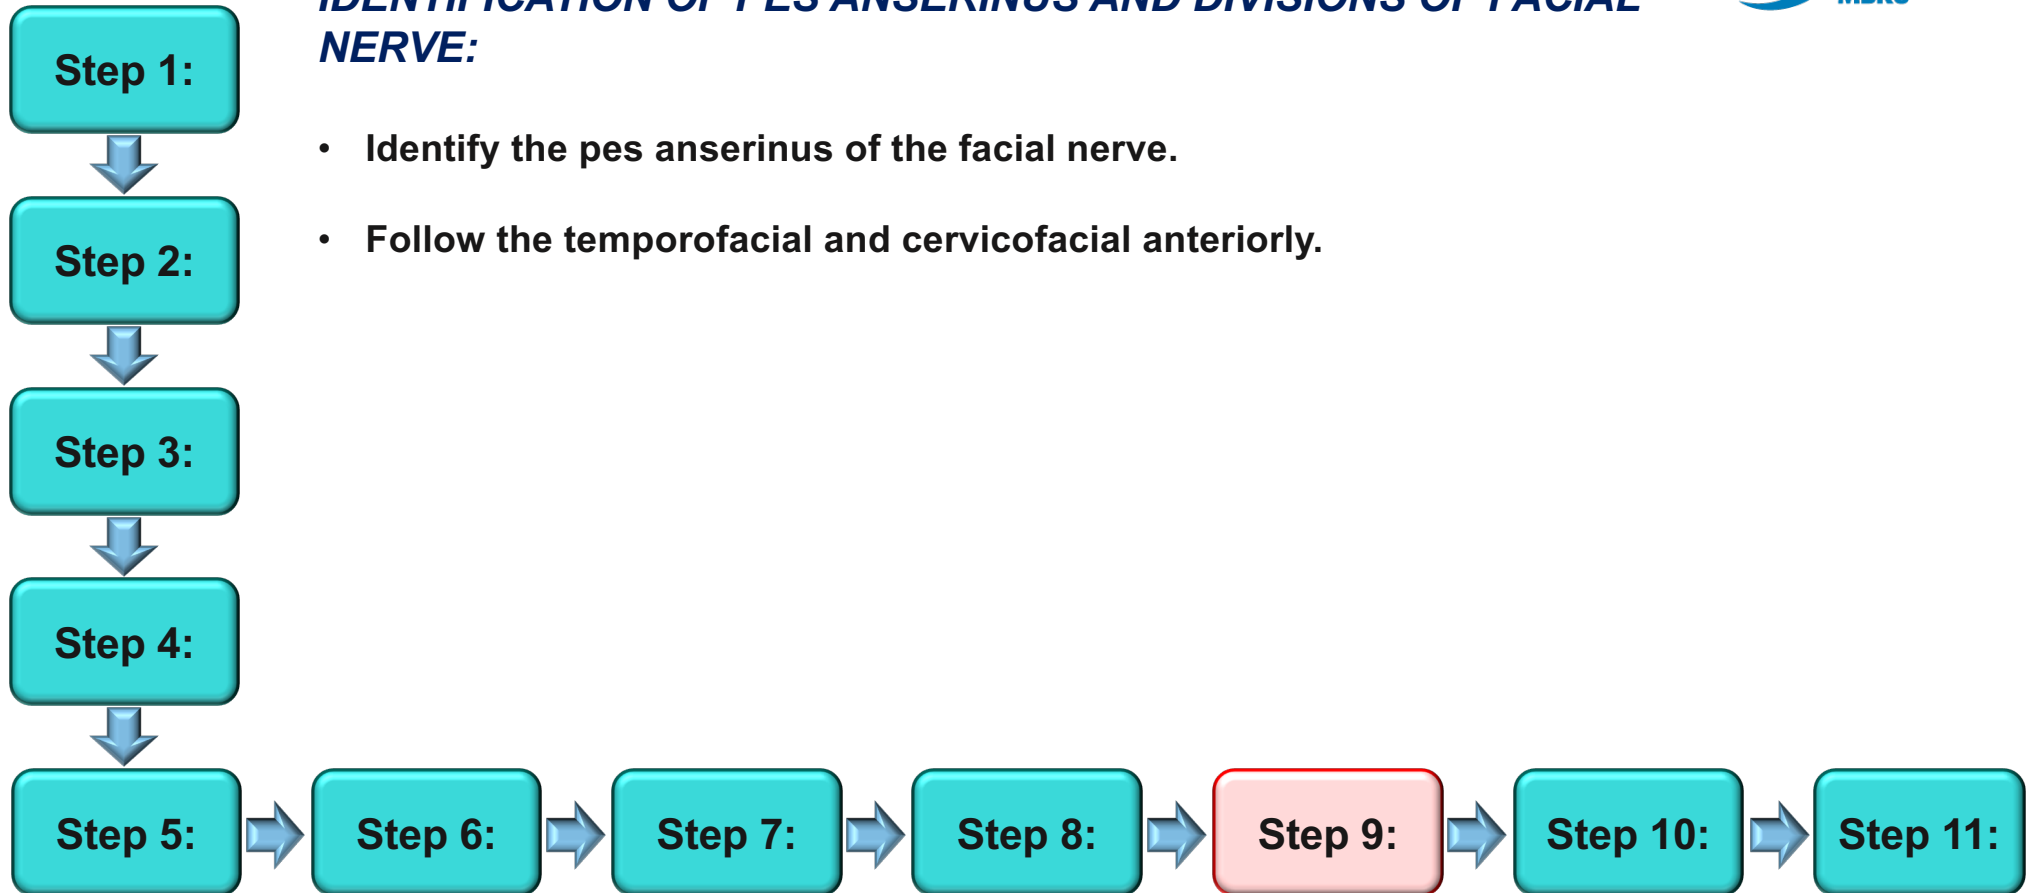

## ***DISSECTION OF FACIAL NERVE FROM SUPERFICIAL LOBE OF PAROTID GLAND:***

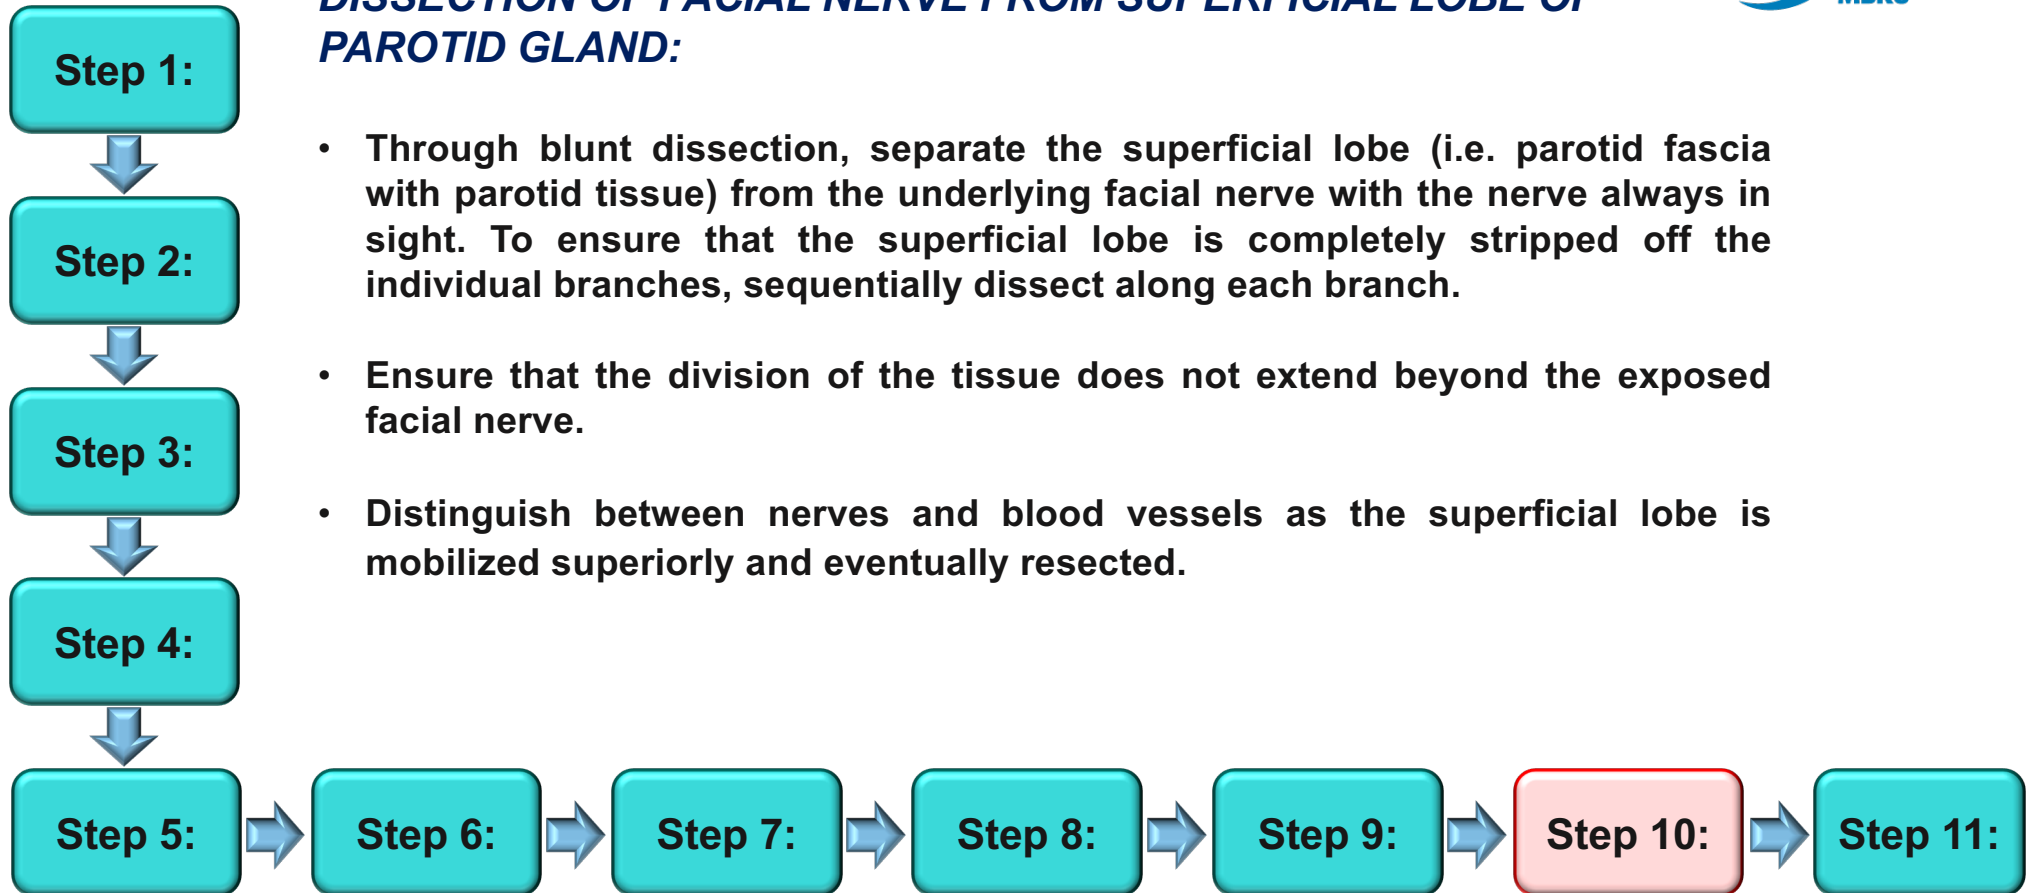

## ***DISSECTION OF FACIAL NERVE FROM DEEP LOBE OF PAROTID GLAND:***

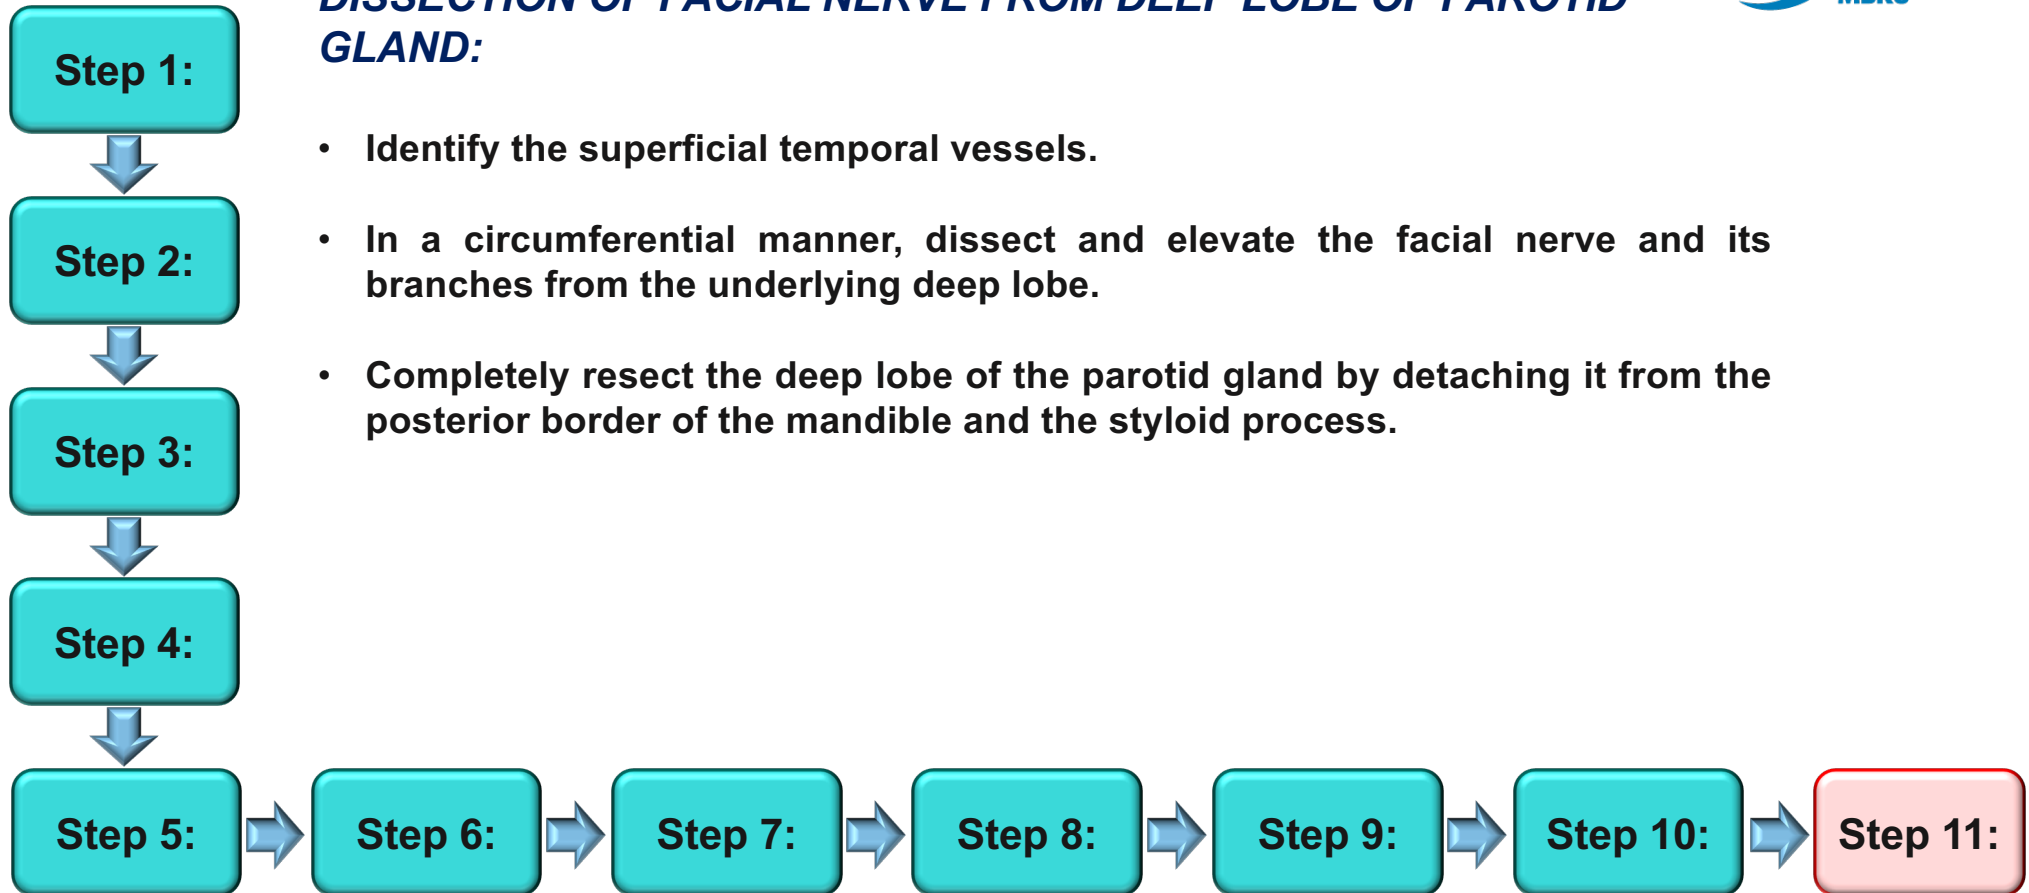

Supplement: mededu_v6i2e21701_app1.pdf [file mededu_v6i2e21701_app1.pdf]
